# Supplementary material for: Characterization of Targeted Phenolic Compounds in Globe Artichoke Heads and Waste from Vegetatively and “Seed”-Propagated Genotypes
Source: MDPI journal article supplement (doi:10.3390/plants12132579), 2023-07-07
Supplement: s1 [file s1]

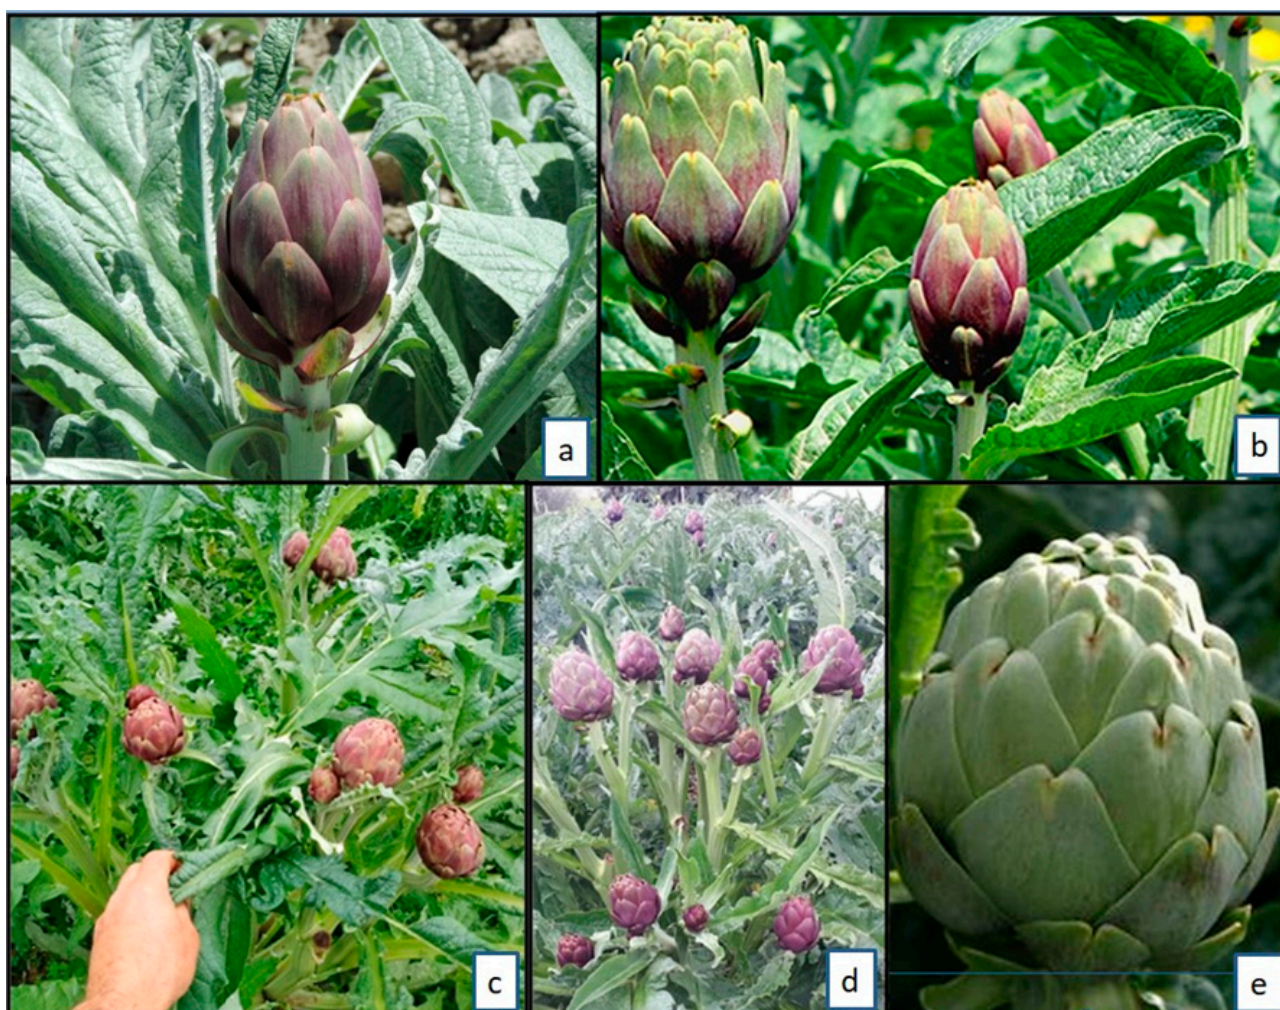

Figure S1 – Vegetatively-propagated varietal types: a) ‘Violetto di Foggia’; b) ‘Brindisino’; “Seed”-propagated varieties: c) ‘Tempo’; d) ‘Opal’; e) ‘Madrigal’.
